# Supplementary material for: Hydrothermal inputs drive dynamic shifts in microbial communities in Lake Magadi, Kenya Rift Valley
Source: Copernicus journal article supplement (doi:10.5194/egusphere-2024-3006), 2024-10-02
Supplement: Supplementary file 1 [file egusphere-2024-3006-supplement.zip]

## Sheet: FAMEs
This table has been submitted to pangaea.de with the temporary ID: PDI-39416
	Depth (mbs)	Age (ka)	C16	C17	C18	C19	C20	C21	C22	C23	C24	C25	C26	C27	C28	C29	C30	C31	C32	C34	CPIFA
			ng g-1 sediment extracted
Interval 1	32.35	14.943	4.97411	6.17454	5.30791	0.89324	2.28279	0.768384	1.57188	0.838032	2.13981	0.280004	1.29753	0.129668	0.811985	0.264433	0.629939	0.125705	0.364374	2.7723	3.12302
Interval 2	43.06	38.993	158.891	11.4731	113.761	42.8833	19.2984	4.98665	39.1977	17.3255	25.2171	26.9534	86.779	0	71.2797	34.6179	101.351	330.089	144.239	834.322	2.7469
	46.11	48.702	96.2636	9.27603	134.475	70.2385	18.3781	5.93888	12.1071	23.3206	280.116	10.1854	52.319	7.14088	61.4211	32.7231	77.1421	75.6712	67.5735	30.3745	4.32707
	49.16	56.15	131.995	26.8083	188.134	32.2327	125.661	54.2986	270.627	87.2676	650.609	67.941	534.53	36.7693	343.657	29.1361	149.611	24.0581	61.5204	402.211	6.95074
	50.3	65.224	111.949	57.1784	149.11	1.90595	6.8533	0	76.5623	5.39342	7.85189	1.07463	6.91412	1.04422	11.1924	8.16617	17.5185	72.7048	27.4385	51.2983	8.71622
	58.3	97.718	1298.02	468.982	1014.24	469.37	758.864	694.116	1038.25	880.315	2305.72	305.628	1347.66	64.0597	576.623	446.912	577.828	97.1436	294.571	6174.47	2.50894
	65.44	116.927	147.029	8.76537	136.473	29.3274	175.403	127.432	22.5441	136.674	214.799	105.333	81.6547	69.4764	47.0914	11.6271	75.4437	61.5484	32.5389	509.833	1.17871
Interval 3	70.5	149.774	238.482	44.3135	238.622	8.36411	245.937	98.4821	488.846	151.136	1098.1	149.016	1010.85	81.8238	941.323	100.113	693.708	83.7576	497.746	3394.92	7.07887
	77.3	185.228	1724.46	390.812	1102	509.107	846.832	628.763	1357.83	1085.62	3008.11	454.041	626.475	78.5026	348.732	184.059	341.342	45.9143	220.296	2361.72	2.38595
Interval 4	94.5	315.791	7.66891	8.31177	5.13882	0.0576994	1.7657	0.14144	0.251733	0.12459	0.287986	0.109782	0.322197	0.0725072	0.375301	0.0857831	0.483041	0.0679116	0.281859	0.137866	5.77418
Interval 5	102.88	323.77	157.407	73.9104	281.055	89.7377	431.47	151.054	1624.98	269.852	2423.93	148.573	1024.14	43.6846	196.242	20.9024	43.835	0	25.113	473.2	8.52791
Interval 6	118.35	391	1.63761	5.91839	1.33626	0.0525349	0.134399	0.0899217	0.144713	0.131176	0.251394	0.137944	0.319399	0.166307	0.522126	0.305863	0.871499	0.558223	1.40072	0.114416	1.94739
	122.82	414.42	178.284	31.4619	197.799	40.173	172.797	96.9876	316.836	143.383	495.991	124.388	271.436	67.9242	187.267	66.8494	123.404	182.47	72.3024	733.398	2.97068
	128.41	447	859.108	359.633	957.903	398.638	781.143	329.593	920.88	519.222	1297.07	278.893	388.803	35.2542	215.597	176.286	196.14	30.1155	35.8489	4249.43	2.48444

## Sheet: n-alkanes
	Depth (mbs)	Age (ka)	C23	C24	C25	C26	C27	C28	C29	C30	C31	C32	C33	C34	C35	CPIalk	ACL(25-33)
			ng g-1 sediment extracted
Interval 1	33.281	15.018	617.157	614.716	546.776	512.603	379.163	309.596	474.768	367.772	563.049	479.65	497.55	-	-	1.10365	29.0694
	33.551	15.047	55.3994	37.5212	51.256	37.9816	80.5671	23.8632	83.0992	16.1901	137.578	11.4329	101.975	14.3486	24.0167	3.39547	29.6973
	34.15	15.104	222.625	258.052	274.648	250.829	299.326	163.464	255.3	125.801	248.421	55.2907	147.642	-	-	1.4797	28.5023
	35.068	15.454	175.233	125.893	153.239	99.4906	156.702	80.7799	177.302	53.8833	283	28.7857	231.275	23.3434	76.6869	2.50364	29.5639
	35.418	16.807	125.769	246.093	261.205	202.558	303.405	172.261	293.125	122.776	330.059	40.5045	248.581	-	-	1.75336	29.002
Interval 2	46.96	50.004	131.733	64.0079	191.525	103.854	627.159	144.199	729.835	141.434	1051.32	74.6607	670.088	22.167	126.792	5.68157	29.8448
	47.747	53.61	144.116	186.466	836.883	415.281	3175.6	944.97	5145.19	1566.31	10583.7	801.486	6397.35	2452.5	1017.03	5.87865	30.4177
	48.077	55.112	356.899	393.7	1070.08	541.029	3392.27	771.099	3856.73	1096.51	8398.11	735.285	6066.04	286.754	1122.81	5.63335	30.3166
	49.675	62.449	-	-	187.882	113.135	459.114	157.488	978.407	365.781	4114.45	335.347	3696.24	158.746	680.23	7.80856	31.262
	58.795	97.967	1000.59	507.815	1781.11	1000.01	7406.12	1751.9	10449.5	1875.97	17004.3	1238.88	11811	438.41	2129.3	6.75289	30.2242
	59.055	99.036	591.454	656.082	982.103	580.491	2819.94	785.336	4650.27	1457	13824.5	1009.8	11551	461.623	2114.81	6.3154	30.9003
	59.395	100.458	956.807	396.055	1917.54	1125.42	7176.05	2113.6	12407.1	2921.4	34527.4	2427.31	28712.1	858.774	4780.11	7.88782	30.9103
	62.055	106.047	150.333	116.687	420.844	236.596	1180.56	484.109	2492.4	855.021	9138.83	741.376	7532.77	285.633	1332.69	7.01548	31.1364
	62.645	106.933	95.009	60.6596	196.961	108.53	520.43	215.451	1242.35	395.968	4553.56	333.189	3278.98	113.061	494.705	7.36247	31.0827
	67.815	129.05	56.2913	34.9006	74.1268	39.8187	145.943	69.505	292.063	122.123	1574.32	132.492	1565.73	64.2314	284.834	7.26475	31.4159
Interval 3	70.775	149.744	346.909	148.947	431.254	189.648	1083.33	255.808	1390.58	287.676	3017.92	215.974	2612.64	110.845	586.783	6.7418	30.4755
	70.965	151.286	1286.26	661.287	2493.97	1142.68	8278.34	2196.69	14012	3240.56	45087.5	3343.6	48845.7	1849.58	11022.3	8.96924	31.1819
	71.075	152.166	592.155	440.686	1302.53	665.515	4157.23	1095.65	6459.88	1412.83	18776.4	1380.11	19312.6	613.794	4192.06	8.13816	31.0252
	71.185	153.064	1617.81	900.326	1779.82	1110.94	4073.45	1175.75	5971.31	1425.71	14520.9	1212.78	13171.6	597.131	2969.45	5.79182	30.6819
	73.695	173.415	67.7668	30.6666	76.881	33.3115	121.987	37.6363	167.737	47.1079	463.287	41.6751	461.071	21.3022	107.011	5.74751	30.7192
	75.925	184.478	92.4087	44.6749	126.769	59.9696	261.789	76.4026	439.991	109.055	1362.19	109.802	1368.99	56.306	314.787	7.30535	31.0141
	83.005	-	144.269	43.8979	81.6239	42.6635	170.423	86.0985	313.766	106.543	981.338	99.8311	1129.39	47.4468	218.718	5.76196	31.1718
	86.065	197.229	91.2656	19.7498	30.4733	25.8444	67.7356	24.2243	143.109	37.9566	596.196	39.731	349.17	18.2068	57.0892	7.17076	30.9649
Interval 4	94.915	315.791	273.342	1005.27	3821.82	1869.12	14436.5	3453.6	18090.3	2670.62	19995.5	1158.88	10421.8	236.294	1428.16	6.07353	29.5619
	95.045	317.397	205.06	223.881	771.202	354.644	2312.62	674.121	3281.94	711.269	4873.38	306.599	3002.09	101.539	530.976	5.6563	29.9862
	95.145	317.495	499.687	406.183	963.345	365.008	1911.25	574.747	3919.43	979.215	16890.7	1291.47	23458.3	934.179	6998.62	9.86106	31.5441
	95.295	-	387.294	319.266	360.713	207.134	382.47	166.278	414.957	153.283	941.456	80.5303	895.58	37.1148	211.072	2.95851	30.0876
Interval 5	103.157	323.774	1567.97	1581.52	3073.1	1440.65	7870.76	2512.88	11557.2	2610.4	26719	2147.16	22445.2	811.619	3599.19	5.9486	30.6073
	103.487	323.92	256.305	196.183	419.097	171.209	773.355	201.085	680.49	207.652	915.798	62.0645	448.603	21.9214	80.2861	3.74757	29.1245
	103.787	324.052	1091.05	701.995	1121.01	474.07	1736.77	736.002	2827.41	539.654	3776.77	245.334	1504.8	67.6085	255.05	3.98949	29.512
Interval 6	119.64	391.053	69.0933	44.2339	82.3635	49.0996	124.297	41.049	88.1139	54.2307	287.697	13.2702	95.9875	17.0743	17.0743	3.29404	29.562
	121.662	403.658	804.303	835.733	1181.26	684.014	1078.01	463.361	798.762	283.727	1582.29	159.497	1431.32	102.069	438.004	2.37318	29.3308
	123.431	414.42	207.813	105.861	247.226	113.678	428.264	140.844	562.137	168.53	1573.84	143.775	1707.45	79.2816	451.26	5.60304	30.7996
	129.77	453.319	2125.32	1080.71	3746.38	1579.13	11510.4	2754.32	12842.7	3000.08	24823.3	1811.09	20628.4	763.82	4445.44	6.28828	30.2801
	129.835	453.728	1874.69	923.493	2511.9	1089.72	7230.95	18285.2	8930.18	1699.23	14572.7	1034.31	8948.65	1135.9	1246.72	1.67843	29.9582
	129.955	454.424	651.849	309.047	885.497	348.5	1916.53	437.927	1873.13	636.068	4118.44	330.966	3606.87	149.482	943.8	5.29596	30.233
	130.21	456.183	229.811	144.636	258.202	125.351	661.576	219.097	761.214	477.835	2989.14	168.206	1948.84	66.4254	448.372	5.07386	30.725
